# Supplementary material for: Pretreatment elevated prognostic nutritional index predicts a favorable prognosis in patients with prostate cancer
Source: BMC Cancer. 2020 Apr 29;20:361. doi: 10.1186/s12885-020-06879-1 (PMC7191702; doi:10.1186/s12885-020-06879-1)
Supplement: Supplementary file 1 — Additional file 1. [file 12885_2020_6879_MOESM1_ESM.xlsx]

## Sheet: Sheet1
age	psa	gleason score	metastasis	risk stratification	albumin	lymphocyte count	pni	pfs(1 yes; 2 no)	pfst(months)	css(1 no; 2 yes)	csst(months)	os(1 no; 2 yes)	ost(months)
50-59	589	8	1	1	44.3	2.6	57.3	1	12	1	47	1	47
50-59	204	9	1	1	45.5	2.28	56.9	1	6	2	20	2	20
50-59	142	9	1	1	33	1.46	40.3	1	12	2	26	2	26
50-59	150	9	1	1	45.4	1.27	51.75	1	10	2	36	2	36
50-59	216	9	1	1	36.3	1.5	43.8	1	6	2	11	2	11
50-59	55.8	7	1	1	45.7	1.61	53.75	1	4	2	12	2	12
50-59	216	9	1	1	36.3	1.5	43.8	1	6	2	11	2	11
50-59	100	8	0	1	42.4	2.58	55.3	1	12	2	29	2	29
50-59	268	9	1	1	39.5	0.66	42.8	1	6	2	33	2	33
50-59	258	8	1	1	52.1	2	62.1	2	53	1	53	1	53
50-59	261	7	1	1	43.7	1.77	52.55	1	17	1	71	1	71
50-59	255	8	0	1	44.6	2.08	55	2	52	1	52	1	52
50-59	62.7	9	1	1	44.6	1.76	53.4	1	46	1	57	1	57
50-59	238	8	1	1	44.6	2.5	57.1	1	9	2	44	2	44
50-59	77.28	6	1	1	47.3	2.37	59.15	1	12	1	37	1	37
50-59	11.649	7	0	0	49.9	1.9	59.4	2	51	1	51	1	51
60-69	100	8	1	1	45.6	2.52	58.2	2	72	1	72	1	72
60-69	52.2	7	1	1	46.1	1.4	53.1	2	38	1	38	1	38
60-69	58.5	9	0	1	47.7	1.9	57.2	2	54	1	54	1	54
60-69	261	8	1	1	44.4	0.85	48.65	1	3	2	24	2	24
60-69	198	7	0	1	47.4	1.34	54.1	2	70	1	70	1	70
60-69	49.013	8	1	1	47.9	1.6	55.9	1	36	1	41	1	41
60-69	276	8	0	1	46.8	2.42	58.9	1	21	1	41	1	41
60-69	225	8	1	1	45	1.67	53.35	1	9	2	27	2	27
60-69	100	9	1	1	44	2.3	55.5	1	29	2	43	2	43
60-69	78.1	9	1	1	40.6	1.87	49.95	1	9	2	21	2	21
60-69	132	8	0	1	45	1.64	53.2	2	16	1	16	1	16
60-69	19.29	8	0	1	47.2	1.95	56.95	1	38	1	64	1	64
60-69	100	8	1	1	33.2	0.92	37.8	1	5	2	12	2	12
60-69	126	6	0	1	43.1	2.7	56.6	2	45	1	45	1	45
60-69	18.7	6	0	0	46.5	1.25	52.75	2	38	1	38	1	38
60-69	78.1	9	1	1	40.6	1.87	49.95	1	9	2	21	2	21
60-69	0.85	7	0	0	46.6	1.57	54.45	2	57	1	57	1	57
60-69	264	9	1	1	41.4	2.49	53.85	1	5	2	12	2	12
60-69	100	9	1	1	42	1.53	49.65	2	16	1	16	1	16
60-69	261	8	1	1	42.5	1.49	49.95	1	22	1	71	1	71
60-69	270	8	0	1	46.6	2.21	57.65	1	30	1	30	2	30
60-69	57	8	0	1	44.9	1.98	54.8	2	53	1	53	1	53
60-69	124	7	0	1	45.7	1.74	54.4	1	50	1	74	1	74
60-69	5.28	8	0	1	45.5	2.92	60.1	2	32	1	32	1	32
60-69	45.7	7	1	1	43.3	1.1	48.8	2	39	1	39	1	39
60-69	23.62	8	0	1	42.5	1.29	48.95	1	11	1	26	1	26
60-69	100	7	1	1	45	1.21	51.05	2	17	1	17	1	17
60-69	54.91	8	0	1	45	1.99	54.95	2	17	1	17	1	17
60-69	280	7	0	1	45.7	1.72	54.3	1	25	1	44	1	44
60-69	72.43	9	1	1	45.4	1.33	52.05	1	31	1	32	1	32
60-69	106	8	1	1	43.5	1.74	52.2	2	32	1	32	1	32
60-69	100	8	1	1	45.8	1.81	54.85	2	28	1	28	1	28
60-69	91.6	9	0	1	46.1	2.4	58.1	2	39	1	39	1	39
60-69	261	8	0	1	40.6	1.07	45.95	2	48	1	48	1	48
60-69	1000	8	0	1	39	1.07	44.35	1	15	1	17	1	17
60-69	100	7	1	1	37.9	1.34	44.6	1	9	2	26	2	26
60-69	276	9	1	1	39.2	1.97	49.05	1	10	2	25	2	25
60-69	51.9	7	0	1	45.2	1.31	51.75	2	34	1	34	1	34
60-69	100	8	0	1	46.5	1.53	54.15	2	29	1	29	1	29
60-69	78.8	7	1	1	43.9	1.89	53.35	2	27	1	28	1	28
60-69	12.45	9	0	1	38.5	1.1	44	2	34	1	34	1	34
60-69	37.74	8	0	1	41.3	0.6	44.3	2	62	1	62	1	62
60-69	26.3	8	0	1	41.4	1.7	49.9	2	28	1	28	1	28
60-69	26.3	8	0	1	41.4	1.7	49.9	2	28	1	28	1	28
60-69	633	7	1	1	47.4	1.65	55.65	2	22	1	22	1	22
60-69	25.2	7	1	1	44.7	2.44	56.9	2	28	1	28	1	28
60-69	236	9	1	1	42.5	1.5	50	1	12	1	30	1	30
60-69	36.61	8	1	1	43.3	1.9	52.8	1	18	1	23	1	23
60-69	34	5	0	1	45.7	1.07	51.05	1	48	1	73	1	73
60-69	93.5	7	1	1	45.8	2.25	57.05	1	42	1	64	1	64
60-69	47.82	7	1	1	43.2	0.63	46.35	1	26	1	50	1	50
60-69	265	10	0	1	40.9	1.23	47.05	1	10	2	32	2	32
60-69	137	7	1	1	41	2.21	52.05	2	16	1	16	1	16
60-69	100	8	1	1	37.4	2.13	48.05	1	23	2	43	2	43
60-69	100	7	1	1	43.2	2.22	54.3	2	42	1	42	1	42
60-69	308	7	1	1	39.9	1.81	48.95	1	5	2	16	2	16
60-69	100	7	1	1	43	2	53	2	14	1	14	1	14
60-69	280	9	1	1	38.5	1.6	46.5	1	4	2	8	2	8
60-69	37	9	1	1	37.7	1.18	43.6	1	24	1	50	1	50
60-69	1000	8	1	1	37.3	1.7	45.8	1	18	1	44	1	44
60-69	15.1	6	1	1	42.8	1.81	51.85	1	7	1	7	2	7
60-69	268	7	1	1	43.3	1.26	49.6	1	11	2	26	2	26
60-69	86.62	8	1	1	47	1.64	55.2	1	12	2	34	2	34
60-69	18	7	1	0	41.7	1.37	48.55	2	37	1	37	1	37
70-79	226	8	0	1	47.5	3.23	63.65	2	46	1	46	1	46
70-79	100	8	1	1	45.9	2.33	57.55	1	19	2	24	2	24
70-79	100	8	1	1	48.6	1.63	56.75	1	42	1	71	1	71
70-79	41.31	7	1	1	36.3	1.4	43.3	1	4	2	5	2	5
70-79	350	7	1	1	46	1.51	53.55	2	53	1	53	1	53
70-79	261	9	0	1	41	1.79	49.95	1	20	1	47	1	47
70-79	98	8	0	1	35.9	2.46	48.2	1	7	2	11	2	11
70-79	12.16	9	0	1	42.6	1.5	50.1	2	48	1	48	1	48
70-79	39.24	7	1	1	39.6	1.3	46.1	2	28	1	28	1	28
70-79	126	8	1	1	43.2	1.52	50.8	1	6	2	18	2	18
70-79	100	7	0	1	42.2	1.23	48.35	1	38	1	58	1	58
70-79	135.15	9	1	1	44	1.54	51.7	2	14	1	14	1	14
70-79	58.5	7	1	1	36.2	1.16	42	1	42	1	73	1	73
70-79	22.1	8	0	1	49.1	1.28	55.5	2	59	1	59	1	59
70-79	30.7	10	0	1	41.8	1.87	51.15	1	22	1	23	2	23
70-79	157	7	0	1	43.2	0.87	47.55	2	28	1	28	1	28
70-79	4.99	8	0	1	43.4	1.5	50.9	2	54	1	54	1	54
70-79	165	8	0	1	41.7	1.2	47.7	1	13	2	17	2	17
70-79	155	7	0	1	40.6	1.13	46.25	2	41	1	41	1	41
70-79	267	8	1	1	41.6	1.95	51.35	2	68	1	68	1	68
70-79	403.5	8	1	1	35.3	1.85	44.55	1	7	2	20	2	20
70-79	72.5	9	0	1	46.9	1.1	52.4	1	43	1	47	1	47
70-79	63.6	6	0	1	42.1	0.95	46.85	2	43	1	43	1	43
70-79	77	8	1	1	35.5	1.54	43.2	1	7	2	12	2	12
70-79	49.38	8	0	1	46	2.91	60.55	2	14	1	14	1	14
70-79	427	8	1	1	45.6	2	55.6	1	39	1	46	1	46
70-79	280	7	1	1	41	1.26	47.3	1	10	2	14	2	14
70-79	61.1	7	0	1	44.4	1.4	51.4	2	47	1	47	1	47
70-79	60.4	7	0	1	42.6	1.4	49.6	2	36	1	36	1	36
70-79	21.6	8	0	1	46.3	1.3	52.8	1	28	1	35	1	35
70-79	100	8	0	1	40.3	1.4	47.3	2	32	1	32	1	32
70-79	100	8	1	1	39.4	0.9	43.9	1	6	2	24	2	24
70-79	48.73	7	0	1	38.7	3.3	55.2	2	61	1	61	1	61
70-79	270	7	1	1	40.6	1.69	49.05	2	59	1	59	1	59
70-79	49.7	7	0	1	47.8	1.83	56.95	2	62	1	62	1	62
70-79	23	9	1	1	31.9	0.9	36.4	1	7	2	7	2	7
70-79	116	7	1	1	39.8	1.39	46.75	2	64	1	64	1	64
70-79	154	7	0	1	38.5	1.14	44.2	1	42	1	46	1	46
70-79	270	7	1	1	40.6	1.69	49.05	2	59	1	59	1	59
70-79	280	7	1	1	45.5	1.26	51.8	1	11	2	12	2	12
70-79	6.46	9	0	1	38.6	1.54	46.3	2	18	1	18	1	18
70-79	100	9	1	1	37.6	1.04	42.8	2	74	1	74	1	74
70-79	300	8	1	1	44.2	2.81	58.25	1	53	1	58	1	58
70-79	200	7	1	1	40.5	1.29	46.95	1	55	1	57	1	57
70-79	53.66	7	0	1	47.3	1.36	54.1	1	35	1	42	1	42
70-79	8.5	9	0	1	40.2	1.17	46.05	2	46	1	46	1	46
70-79	36	9	1	1	39.1	1.05	44.35	1	19	2	30	2	30
70-79	28.78	6	0	1	47.9	1.4	54.9	2	40	1	40	1	40
70-79	243	7	1	1	46.9	1.3	53.4	1	17	1	26	1	26
70-79	66	8	0	1	43.1	1.8	52.1	2	37	1	37	1	37
70-79	100	8	1	1	45.8	2.8	59.8	1	17	2	26	2	26
70-79	26.6	7	1	1	42.3	1.67	50.65	2	30	1	30	1	30
70-79	51.3	7	0	1	40.6	1.69	49.05	1	62	1	74	1	74
70-79	15.9	6	0	0	47.5	1.48	54.9	2	66	1	66	1	66
70-79	34.4	7	0	1	43.7	1.75	52.45	2	58	1	58	1	58
70-79	26.6	7	1	1	42.3	1.67	50.65	2	30	1	30	1	30
70-79	5.62	6	0	0	41.7	1.28	48.1	2	48	1	48	1	48
70-79	50.2	7	1	1	43.1	1.37	49.95	1	20	2	35	2	35
70-79	118	7	0	1	49.5	2.58	62.4	1	55	1	55	1	55
70-79	190	7	0	1	46.4	2.32	58	2	34	1	34	1	34
70-79	268	8	1	1	45.4	1.57	53.25	1	18	2	46	2	46
70-79	243	7	0	1	43.4	2.2	54.4	1	39	1	55	1	55
70-79	56.1	8	1	1	46	1.45	53.25	2	16	1	16	1	16
70-79	10.8	6	0	0	42.6	1.29	49.05	1	41	1	41	2	41
70-79	12.48	6	0	0	43.9	1.21	49.95	2	64	1	64	1	64
70-79	84.9	8	0	1	43.8	1.04	49	2	40	1	40	1	40
70-79	20	4	0	0	38.7	1.24	44.9	1	54	1	59	1	59
70-79	118	7	0	1	49.5	2.58	62.4	2	55	1	55	1	55
70-79	63.7	8	0	1	42.2	1.12	47.8	1	43	1	43	2	43
70-79	100	8	1	1	45.1	3.07	60.45	2	41	1	41	1	41
70-79	200	8	0	1	41.9	1.47	49.25	2	40	1	40	1	40
70-79	56.1	7	0	1	46.2	2.79	60.15	2	35	1	35	1	35
70-79	100	9	1	1	45	1.03	50.15	1	7	2	12	2	12
70-79	76.4	7	1	1	44.7	2.2	55.7	1	20	1	30	1	30
70-79	18.03	7	0	0	42	1.7	50.5	2	30	1	30	1	30
70-79	28.1	7	0	1	39.1	1.66	47.4	2	63	1	63	1	63
70-79	28.1	7	0	1	39.1	1.66	47.4	2	63	1	63	1	63
70-79	21.4	6	0	1	47.3	1.48	54.7	2	63	1	63	1	63
70-79	30.9	7	1	1	36.7	1.89	46.15	2	56	1	56	1	56
70-79	33	7	0	1	43.5	0.57	46.35	2	35	1	35	1	35
70-79	5.36	7	0	0	43.7	2.16	54.5	1	8	1	31	1	31
70-79	23.9	6	0	1	41.4	2.33	53.05	2	31	1	31	1	31
70-79	109	8	1	1	40.6	0.92	45.2	1	16	2	22	2	22
70-79	123	8	0	1	39.6	2.19	50.55	2	59	1	59	1	59
70-79	262	7	1	1	40.2	1.02	45.3	2	29	1	29	1	29
70-79	7.77	7	0	0	41.7	2.07	52.05	2	73	1	73	1	73
70-79	17.5	9	0	1	44.9	1.16	50.7	2	62	1	62	1	62
70-79	255	7	1	1	41.4	2.1	51.9	1	50	1	53	1	53
70-79	11.4	6	1	1	45	1.27	51.35	2	40	1	40	1	40
70-79	10.7	7	0	0	45.9	2.73	59.55	2	43	1	43	1	43
70-79	12.56	7	0	0	44.5	1	49.5	1	37	1	37	2	37
70-79	267	8	1	1	38.8	1	43.8	2	20	1	20	1	20
70-79	12.63	8	0	1	42	1.5	49.5	2	62	1	62	1	62
70-79	37.3	7	0	1	42	1.4	49	2	57	1	57	1	57
70-79	262	7	1	1	42.1	1.36	48.9	2	28	1	29	1	29
70-79	13.1	6	0	0	37.8	1.21	43.85	2	69	1	69	1	69
70-79	4.92	8	1	1	45.1	1	50.1	1	7	2	28	2	28
70-79	207	9	1	1	35.4	1.21	41.45	1	13	2	27	2	27
70-79	150	8	1	1	33.5	0.65	36.75	2	30	1	30	1	30
70-79	270	8	1	1	35.3	1.06	40.6	1	13	2	17	2	17
70-79	262	7	1	1	42.1	1.36	48.9	2	28	1	29	1	29
70-79	262	7	1	1	42.9	1.74	51.6	2	19	1	19	1	19
70-79	19.3	9	1	1	41.6	3.19	57.55	2	26	1	26	1	26
70-79	11.41	8	0	1	43.1	1.05	48.35	1	32	1	32	2	32
70-79	100	9	1	1	40.5	0.96	45.3	1	9	1	37	1	37
70-79	21.18	6	0	1	39	1.59	46.95	2	64	1	64	1	64
70-79	35	7	0	1	45	1.2	51	2	54	1	54	1	54
70-79	259	9	0	1	37.2	1	42.2	1	9	2	14	2	14
70-79	14	7	0	0	44	1.4	51	2	24	1	24	1	24
70-79	33.26	6	0	1	41.9	1.88	51.3	2	24	1	24	1	24
70-79	100	7	1	1	39.5	0.83	43.65	1	7	1	22	1	22
70-79	98.8	7	0	1	44.3	1.35	51.05	2	22	1	22	1	22
70-79	3208	8	1	1	42	0.89	46.45	2	62	1	62	1	62
70-79	109	8	1	1	40.9	0.92	45.5	1	26	1	26	2	26
70-79	49.1	7	0	1	42	1.3	48.5	2	54	1	54	1	54
70-79	3.13	7	0	0	42.4	0.99	47.35	1	22	1	46	1	46
70-79	15.8	6	0	0	47.4	1.3	53.9	2	46	1	46	1	46
70-79	143	8	0	1	45.5	1.35	52.25	1	13	2	27	2	27
70-79	158	8	0	1	38.6	1.57	46.45	2	41	1	41	1	41
70-79	100	7	1	1	35.5	1.47	42.85	2	56	1	56	1	56
70-79	10.9	8	1	1	45.5	2.14	56.2	2	23	1	23	1	23
70-79	436	8	1	1	36.7	1.47	44.05	2	51	1	51	1	51
70-79	112	7	0	1	44.9	1.95	54.65	2	44	1	44	1	44
70-79	261	10	1	1	32.1	1.42	39.2	1	3	2	11	2	11
70-79	128	8	0	1	41.1	1.84	50.3	2	25	1	39	1	39
70-79	7.37	9	0	1	46.8	1.4	53.8	1	15	1	31	2	31
70-79	255	7	1	1	42.7	2.4	54.7	1	22	2	39	2	39
70-79	20.2	7	0	1	43.5	1.38	50.4	2	58	1	58	1	58
70-79	38	7	0	1	38.6	1.35	45.35	2	24	1	24	1	24
70-79	43.1	7	0	1	39.1	1.4	46.1	2	18	1	18	1	18
70-79	24.6	7	0	1	46.4	1.8	55.4	2	57	1	57	1	57
80-89	24.6	7	0	1	46.4	1.8	55.4	2	57	1	57	1	57
80-89	20.4	7	0	1	42.5	0.71	46.05	2	32	1	32	1	32
80-89	173	8	1	1	37.6	1.64	45.8	1	7	2	18	2	18
80-89	22.2	7	0	1	40.6	1.02	45.7	2	21	1	21	1	21
80-89	256	8	0	1	41	1.22	47.1	2	17	1	17	1	17
80-89	261	6	1	1	37.3	1.85	46.55	1	18	1	49	1	49
80-89	8.89	9	0	1	45.4	1.31	51.95	2	40	1	40	1	40
80-89	42.4	7	0	1	45.8	0.85	50.05	2	38	1	38	1	38
80-89	17.115	7	0	0	39.4	2.58	52.3	1	15	1	15	2	15
80-89	56.6	7	0	1	35.8	1.2	41.8	2	44	1	44	1	44
80-89	40.6	7	0	1	47.9	1.44	55.1	2	38	1	38	1	38
80-89	11	6	0	0	40.3	1.95	50.05	2	46	1	46	1	46
80-89	90.8	9	0	1	50.3	2.14	61	1	9	2	21	2	21
80-89	24.5	7	0	1	39.6	1.33	46.25	2	40	1	40	1	40
80-89	17.69	7	0	0	48.3	1.72	56.9	2	28	1	28	1	28
80-89	125	6	0	1	44	1.39	50.95	2	43	1	43	1	43
80-89	258	7	1	1	41.4	1.75	50.15	2	22	1	22	1	22
80-89	100	7	0	1	43	1.81	52.05	2	16	1	16	1	16
80-89	44.4	7	0	1	47.2	0.77	51.05	2	70	1	70	1	70
80-89	108	8	1	1	38	1.65	46.25	1	4	2	7	2	7
80-89	183.9	8	0	1	41.8	1.71	50.35	2	43	1	43	1	43
80-89	393.6	7	1	1	48.3	1.09	53.75	2	35	1	35	1	35
80-89	18.2	7	0	0	42	1.83	51.15	2	26	1	26	1	26
80-89	7.8	7	0	0	39.3	1.5	46.8	1	31	1	31	2	31
80-89	11	6	0	0	40.3	1.95	50.05	2	46	1	46	1	46
80-89	61.4	7	0	1	28	1.18	33.9	2	35	1	35	1	35
80-89	34	8	0	1	40.3	1.46	47.6	2	20	1	20	1	20
80-89	100	8	1	1	46	2.2	57	2	14	1	14	1	14
80-89	27.5	6	0	1	39.7	0.9	44.2	2	68	1	68	1	68
80-89	100	9	1	1	37	0.69	40.45	1	29	2	35	2	35
80-89	96	8	0	1	38.4	1.6	46.4	2	50	1	50	1	50
80-89	53	7	1	1	46.5	0.9	51	2	33	1	33	1	33
80-89	74.3	6	0	1	42.7	1.02	47.8	2	59	1	59	1	59
80-89	18.2	7	0	0	42	1.83	51.15	2	30	1	30	1	30
80-89	100	7	0	1	30.7	1.3	37.2	1	13	2	30	2	30
80-89	153	8	0	1	38.3	1.11	43.85	1	31	2	34	2	34
80-89	157	9	1	1	36.5	1.88	45.9	1	3	2	7	2	7
80-89	8.07	6	0	0	40.4	1.54	48.1	2	23	1	23	1	23
80-89	284.2	9	1	1	44.1	1.22	50.2	1	12	2	16	2	16
80-89	76.6	8	0	1	41.4	1.13	47.05	2	49	1	49	1	49
80-89	75.68	7	0	1	41.1	1.88	50.5	2	44	1	44	1	44
80-89	47.34	8	0	1	40.7	2.03	50.85	1	13	1	27	1	27
80-89	25.2	9	0	1	41.8	1.08	47.2	1	16	2	32	2	32
80-89	22.9	9	0	1	39.8	1.12	45.4	2	30	1	30	1	30
80-89	253	7	1	1	39.5	2.13	50.15	1	25	1	31	1	31
80-89	261	7	1	1	36.3	1.85	45.55	1	28	1	48	1	48
80-89	276	8	1	1	37.7	1.76	46.5	1	5	2	10	2	10
80-89	100	9	0	1	42.4	1.29	48.85	1	12	1	25	1	25
80-89	56.5	9	0	1	34.1	1.83	43.25	1	25	1	25	2	25
80-89	148	8	0	1	42.5	0.52	45.1	1	21	1	44	1	44
80-89	53.8	9	1	1	41.9	1.38	48.8	1	15	1	20	1	20
80-89	83.3	8	1	1	40.3	1.9	49.8	1	22	2	32	2	32
80-89	28.3	7	0	1	44.1	1.89	53.55	2	54	1	54	1	54
80-89	42.3	7	1	1	42.2	1.05	47.45	1	39	1	39	2	39
80-89	28.5	7	0	1	40.6	1.99	50.55	2	26	1	26	1	26
80-89	100	6	1	1	43.3	1.05	48.55	1	45	1	72	1	72
80-89	261	8	1	1	40	0.86	44.3	1	45	2	48	2	48
80-89	167	9	1	1	32.1	0.94	36.8	1	13	1	17	2	17
80-89	13.1	6	0	0	39.3	1.52	46.9	2	42	1	42	1	42
80-89	120	9	1	1	43.2	0.81	47.25	1	4	2	18	2	18
80-89	258	7	0	1	42.1	1.55	49.85	2	21	1	21	1	21
80-89	51.2	8	0	1	41.9	2.17	52.75	1	62	1	69	1	69
80-89	258	7	0	1	42.1	1.55	49.85	2	21	1	21	1	21
80-89	186	8	1	1	38.1	0.63	41.25	2	74	1	74	1	74
80-89	37.4	7	0	1	38.1	1.15	43.85	2	34	1	34	1	34
80-89	174	8	1	1	44.4	1.5	51.9	2	23	1	23	1	23
80-89	211	9	1	1	36.3	2.01	46.35	1	4	2	14	2	14
80-89	42	8	0	1	38.9	1.71	47.45	1	16	1	16	2	16
80-89	206	9	1	1	36.5	1.87	45.85	1	10	2	23	2	23
